# Supplementary material
Source: PubMed Central journal article supplement (PMC1785257)

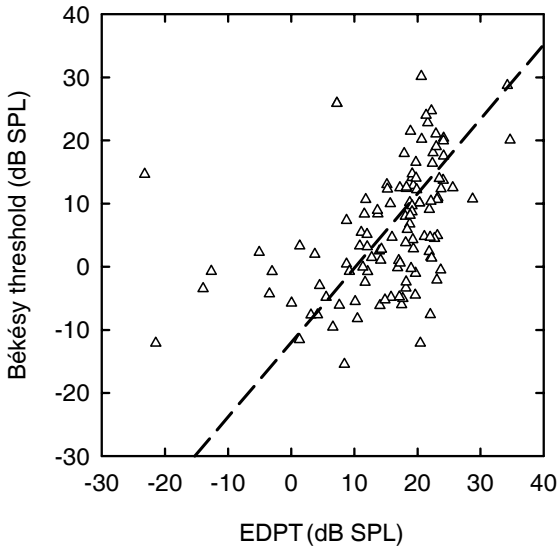

Supplement: pnas_0610185103_1.pdf [file pnas_0610185103_1.pdf]
